# Supplementary material for: FEN1 Blockade for Platinum Chemo-Sensitization and Synthetic Lethality in Epithelial Ovarian Cancers
Source: MDPI journal article supplement (doi:10.3390/cancers13081866), 2021-04-14

F1

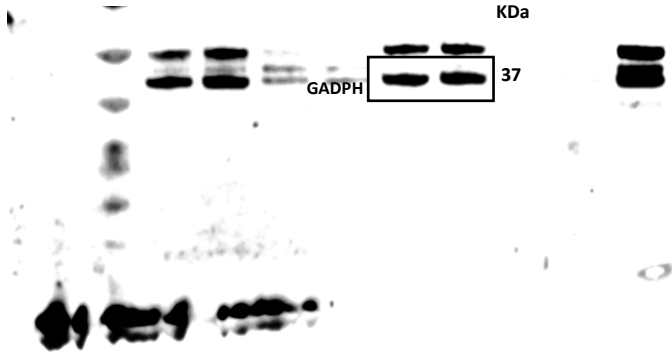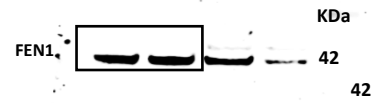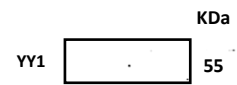

F2

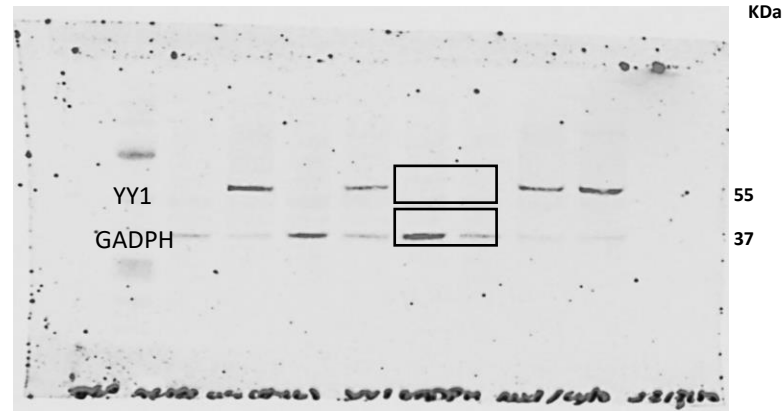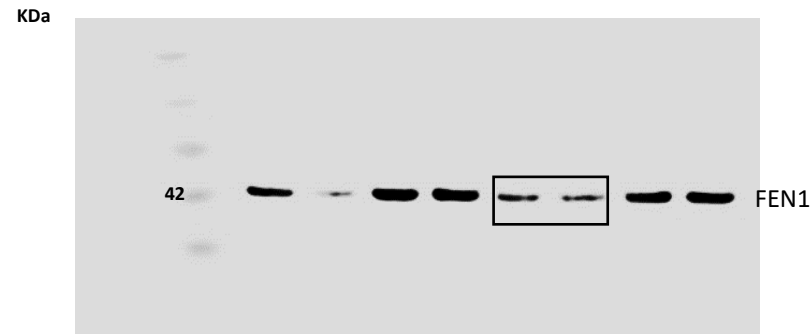

F3

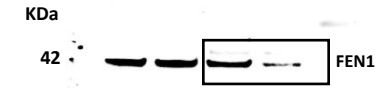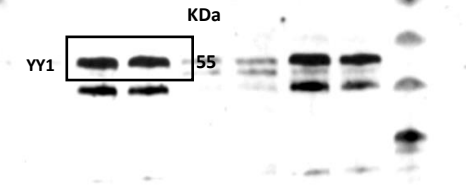

F4

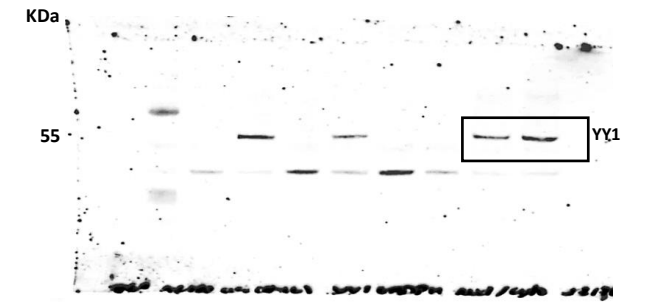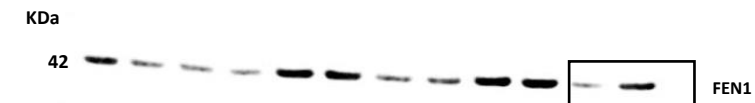

Figure 1

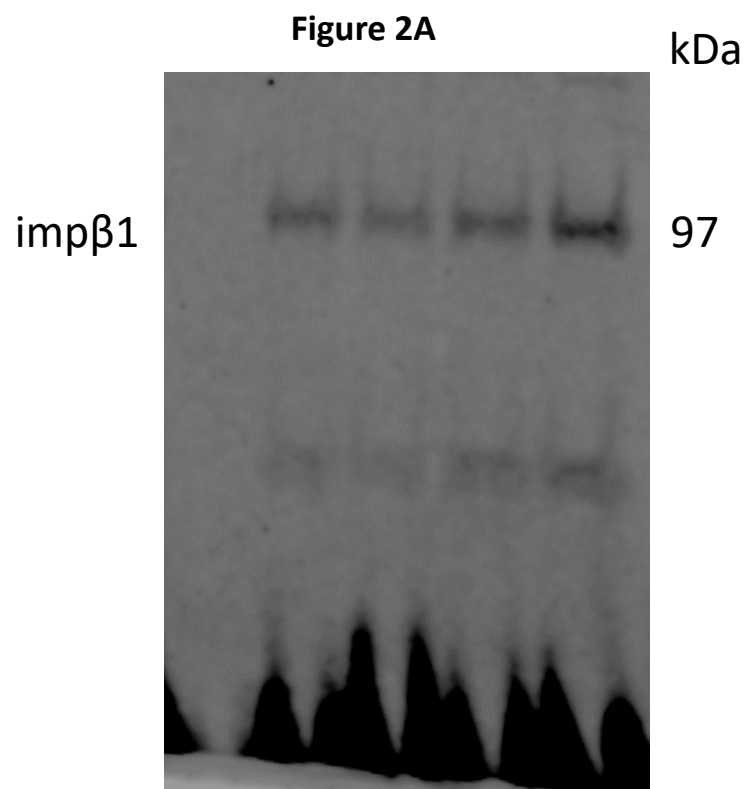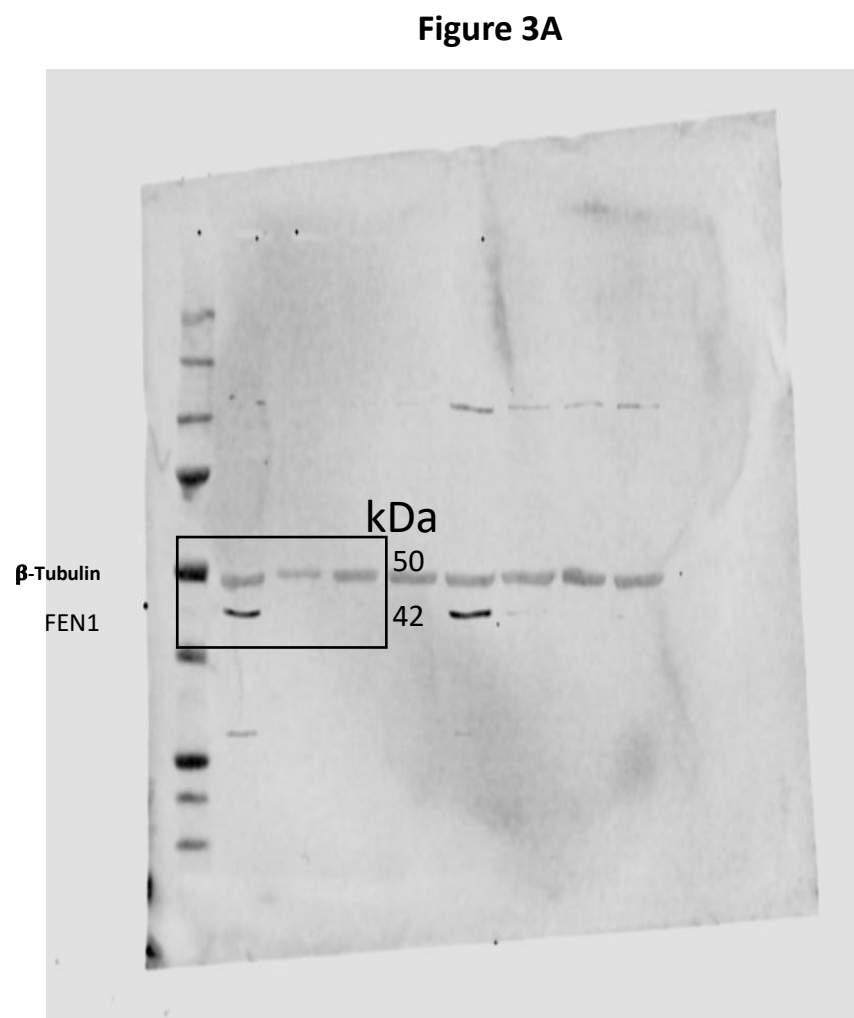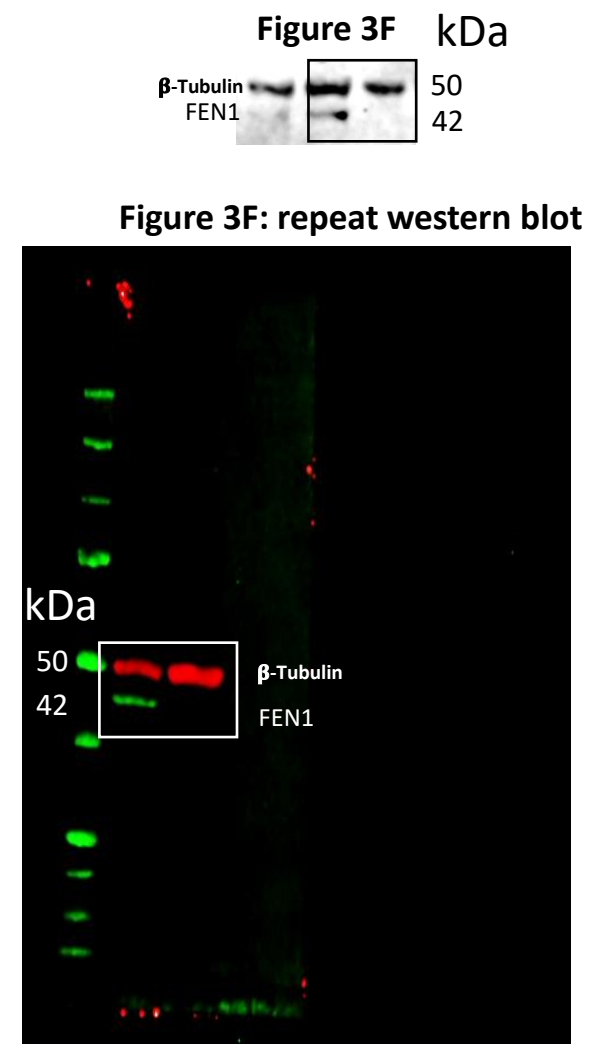

Figure 5A

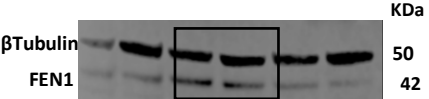

Figure 5B

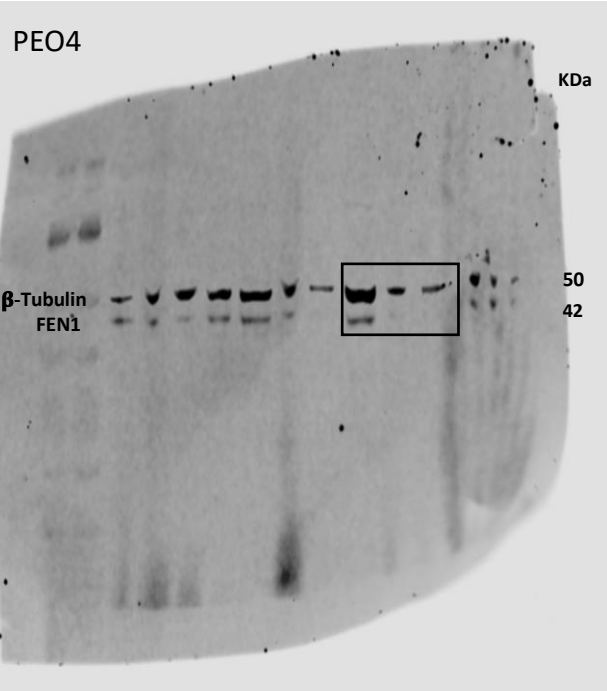

Figure 3M

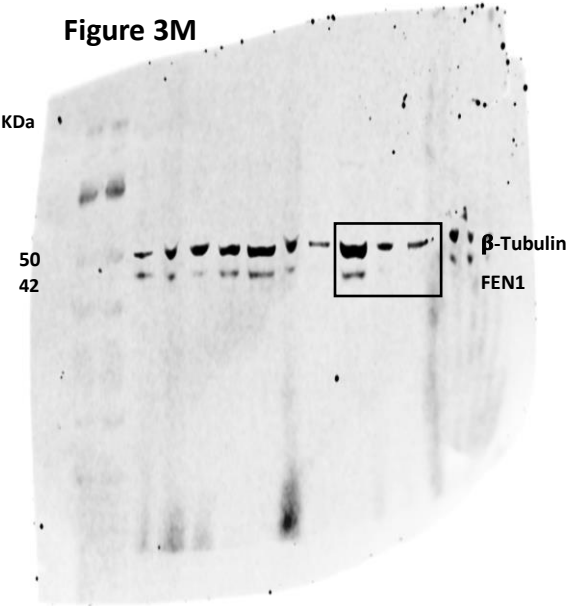

Figure 5B

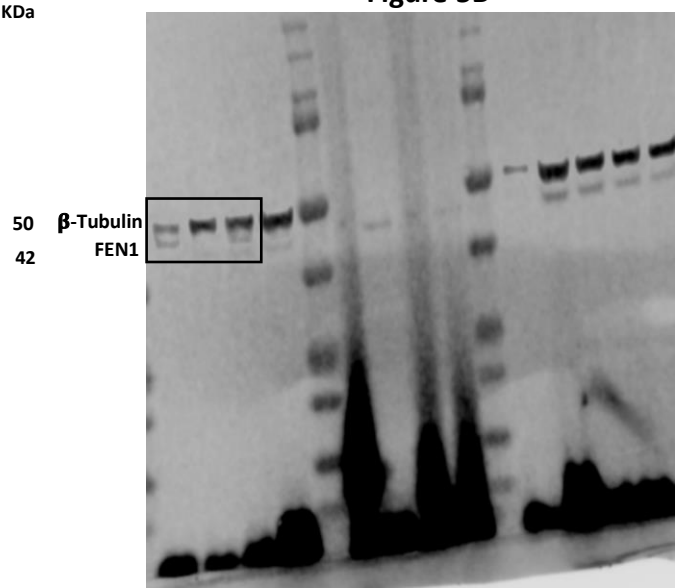

Figure 6K

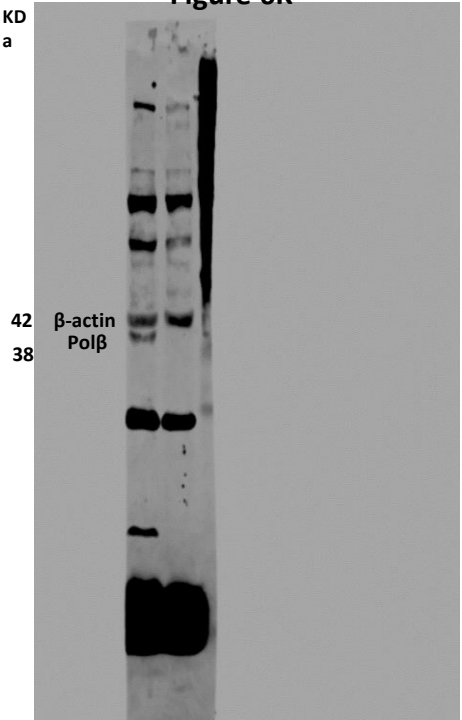

Figure 6H

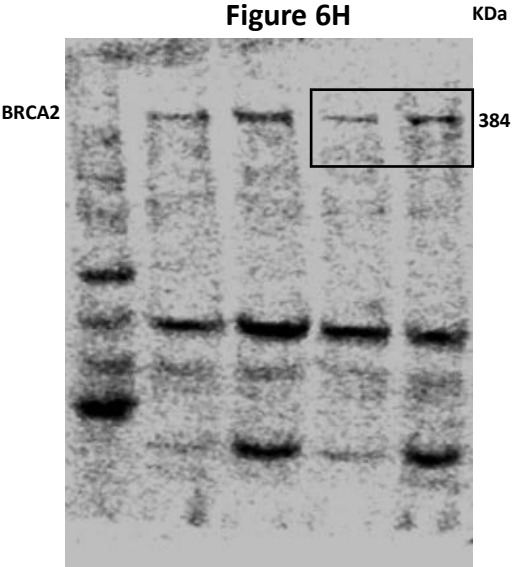

Figure 6J

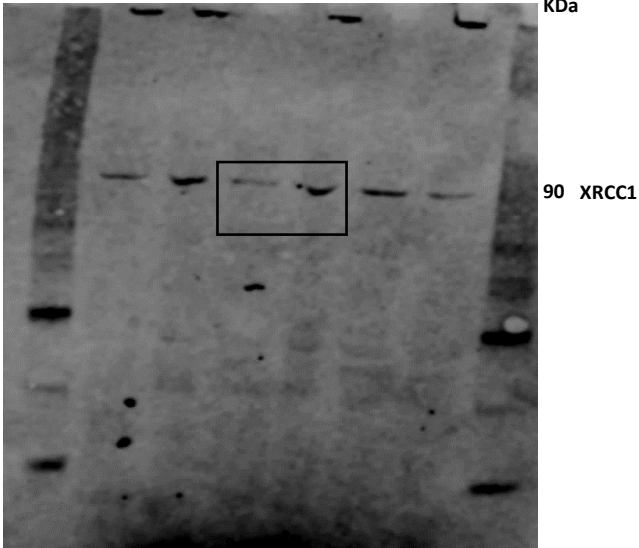

Figure 6I

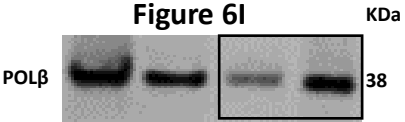

Figure 5A and 6H

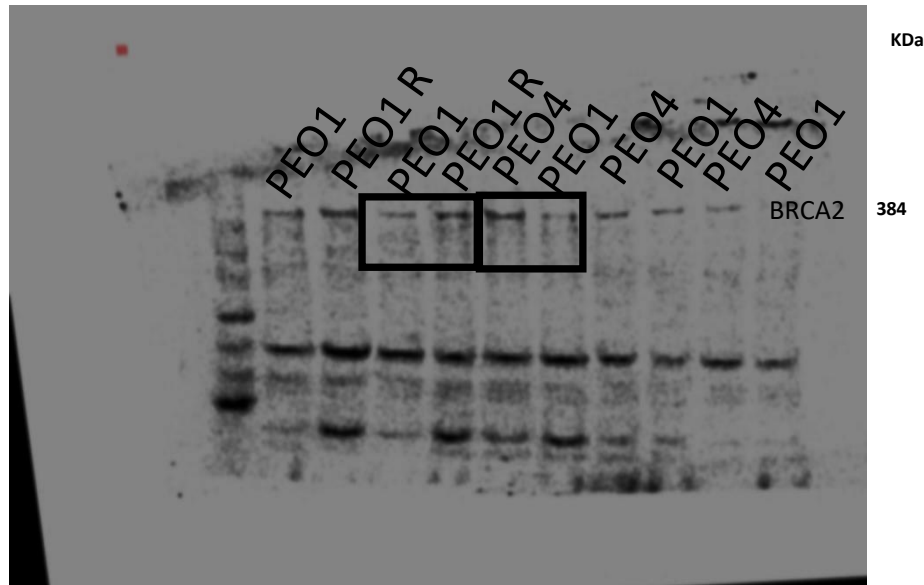

Figure 5A and 6H  $\beta$  actin only

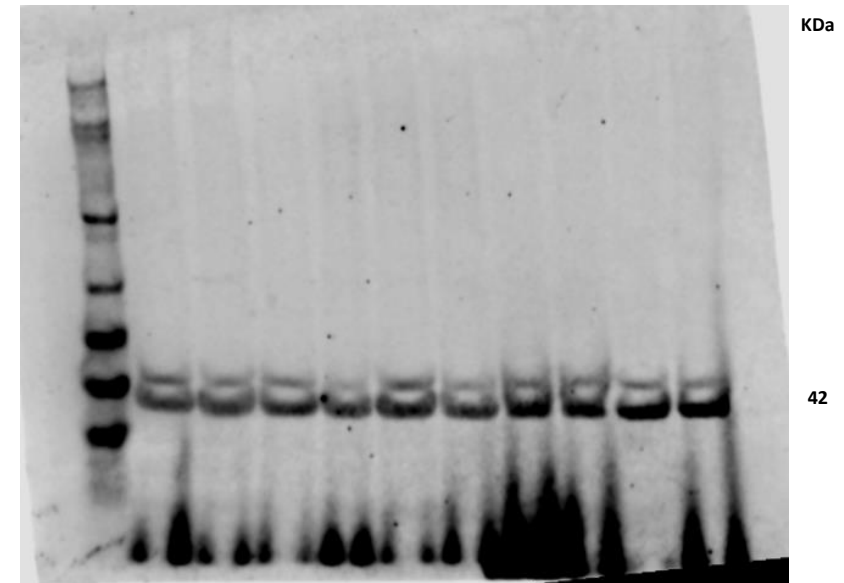

Figure 6I Pol $\beta$

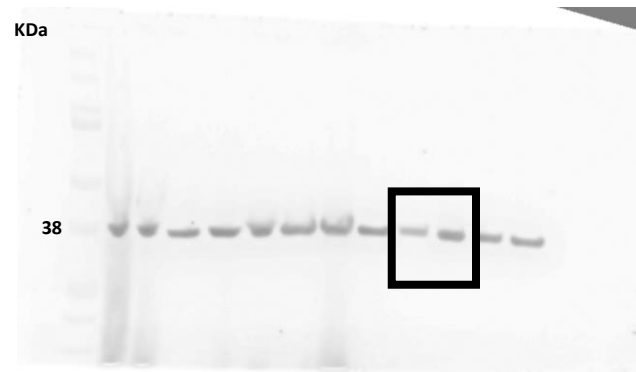

Figure 6I  $\beta$  Actin

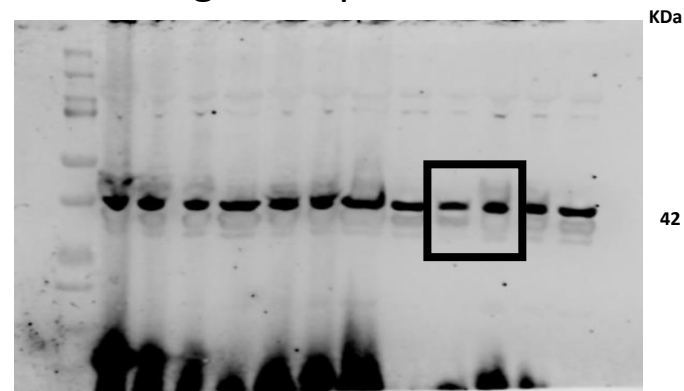

Figure 6J  $\beta$  Actin

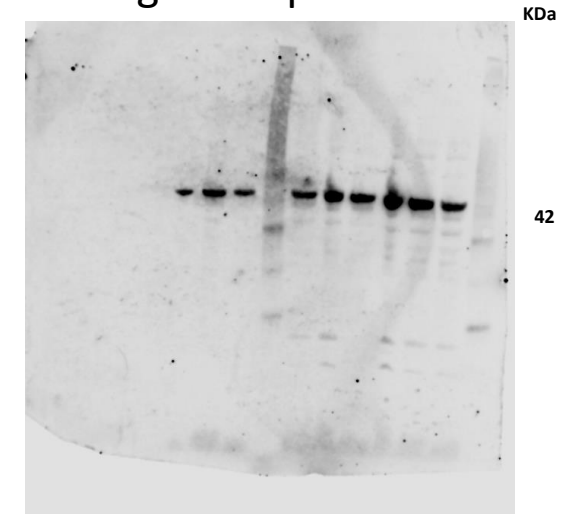

Figure S2A

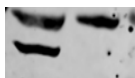

Figure S2A (another western blot)

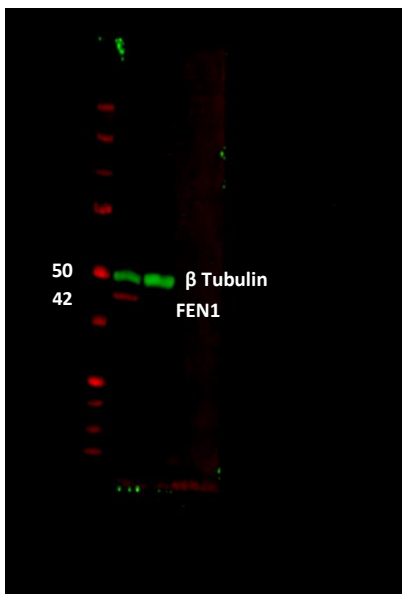

Figure S2E

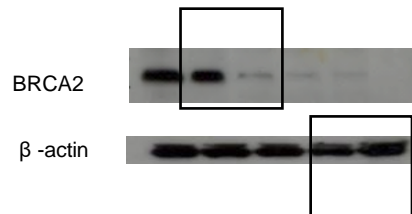

Figure S2E (another western blot)

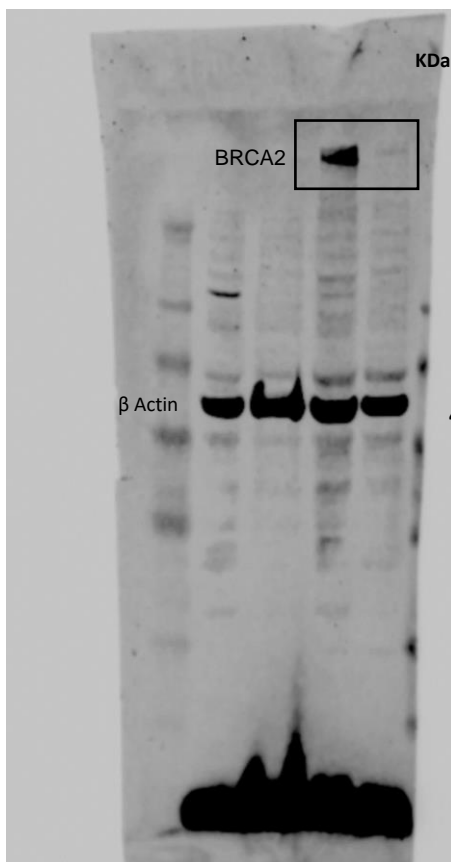

Figure S2F

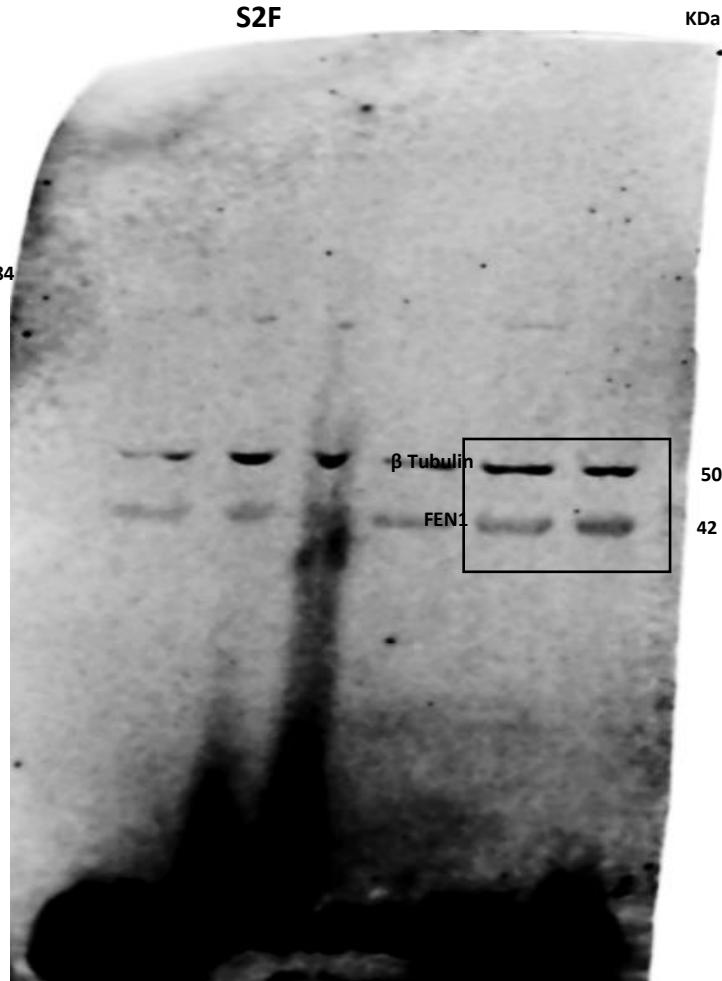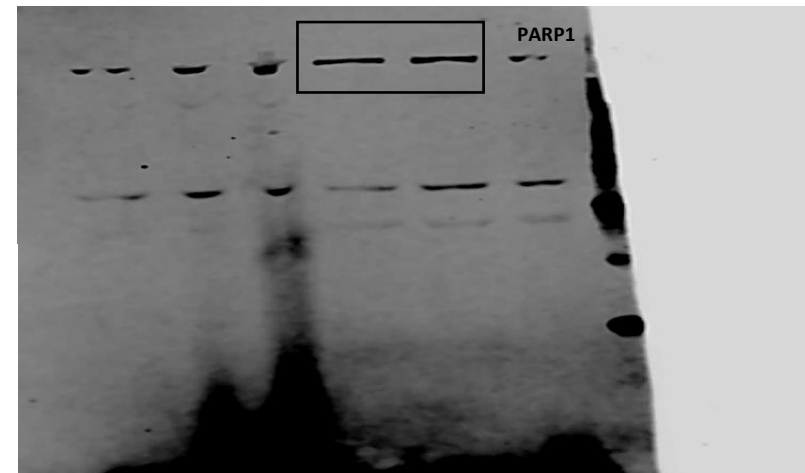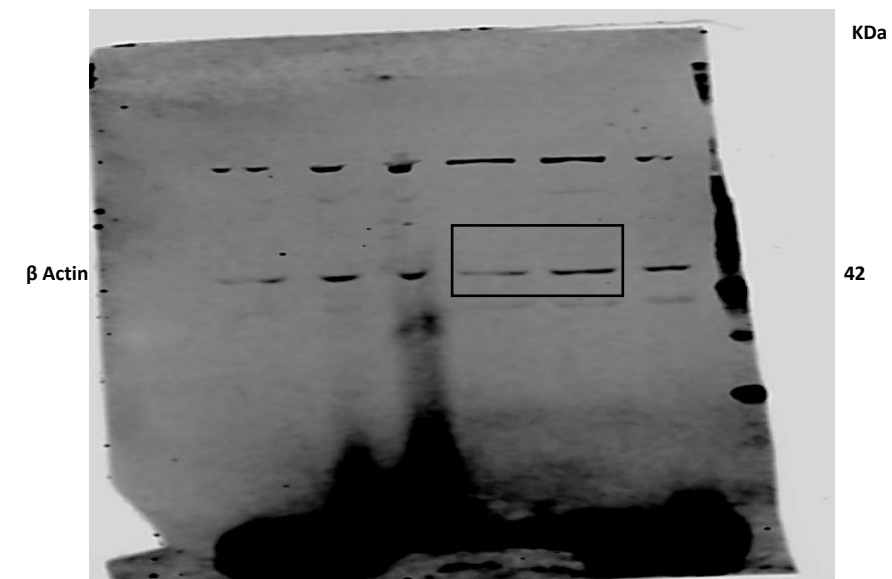

Supplement: s1 [file s1]
